# Supplementary material
Source: PubMed Central journal article supplement (PMC544009)
Supplement: molcellb_25_3_896__1.pdf [file molcellb_25_3_896__1.pdf]

| Plasmid      | End Structure                                                                                                                                                                                                                                                                                                                 | % Ligated BglII Site | % Ligated XhoI Site |
|--------------|-------------------------------------------------------------------------------------------------------------------------------------------------------------------------------------------------------------------------------------------------------------------------------------------------------------------------------|----------------------|---------------------|
| pTW423-0     | CAATTGTAGAGACTATCCACAAGGACAATATT<br>GTTAACATCTCTGATAGGTGTTCTGTTATAA                                                                                                                                                                                                                                                           | 87                   | 77                  |
| pTW423-31    | CAATTGTAGAGACTATCCACAAGGACAATATT<br>GTTAACATCTCTGATAGGTGTTCTGTTATAA                                                                                                                                                                                                                                                           | 54                   | 83                  |
| pTW423-32    | CAATTGTAGAGACTATCCACAAGGACAATATT<br>GTTAACATCTCTGATAGGTGTTCTGTTATAA                                                                                                                                                                                                                                                           | 62                   | 85                  |
| pTW423-34    | CAATTGTAGAGACTATCCACAAGGACAATATT<br>GTTAACATCTCTGATAGGTGTTCTGTTATAA                                                                                                                                                                                                                                                           | 88                   | 88                  |
| pTW423-AT    | CAATTGTAGAAACTATCCACAAGGACAATATT<br>GTTAACATCTCTGATAGGTGTTCTGTTATAA                                                                                                                                                                                                                                                           | 80                   | 86                  |
| pTW423-GC    | CAATTGTAGAGACGATCCACAAGGACAATATT<br>GTTAACATCTCTGCTAGGTGTTCTGTTATAA                                                                                                                                                                                                                                                           | 66                   | 84                  |
| pTW423-36    | CAATTGTAGAGACTATCCACAAGGACAATATT<br>GTTAACATCTCTGATAGGTGTTCTGTTATAA                                                                                                                                                                                                                                                           | 97                   | 90                  |
| pTW423-38    | CAATTGTAGAGACTATCCACAAGGACAATATT<br>GTTAACATCTCTGATAGGTGTTCTGTTATAA                                                                                                                                                                                                                                                           | 85                   | 89                  |
| pTW423-310   | CAATTGTAGAGACTATCCACAAGGACAATATT<br>GTTAACATCTCTGATAGGTGTTCTGTTATAA                                                                                                                                                                                                                                                           | 82                   | 88                  |
| pTW423-313   | CAATTGTAGAGACTATCCACAAGGACAATATT<br>GTTAACATCTCTGATAGGTGTTCTGTTATAA                                                                                                                                                                                                                                                           | 80                   | 68                  |
| pTW423-313/4 | CAATTGTAGAGACTATCCACAAGGACAATATT<br>GTTAACAA GGTGTTCTGTTATAA                                                                                                                                                                                                                                                                  | 83                   | 91                  |
| pTW423-313/9 | CAATTGTAGAGACTATCCAC CAATATT<br>GTTAACAA GGTGTTCTGTTATAA                                                                                                                                                                                                                                                                      | 79                   | 90                  |
| pTW423-317   | CAATTGTAGAGACTATCCACAAGGACAATATT<br>GTTAACATCTCTGATAGGTGTTCTGTTATAA                                                                                                                                                                                                                                                           | 89                   | 74                  |
| pTW423-322   | CAATTGTAGAGACTATCCACAAGGA CAATATT<br>GTTAACATCTCTGATAGGTGTTCTGTTATAA                                                                                                                                                                                                                                                          | 85                   | 75                  |
| pTW423-51    | CAATTGTAGAGACTATCCACAAGGACAATATT<br>GTTAACATCTCTGATAGGTGTTCTGTTATAA                                                                                                                                                                                                                                                           | 99                   | 81                  |
| pTW423-52    | CAATTGTAGAGACTATCCACAAGGACAATATT<br>GTTAACATCTCTGATAGGTGTTCTGTTATAA                                                                                                                                                                                                                                                           | 93                   | 63                  |
| pTW423-54    | CAATTGTAGAGACTATCCACAAGGACAATATT<br>GTTAACATCTCTGATAGGTGTTCTGTTATAA                                                                                                                                                                                                                                                           | 93                   | 88                  |
| pTW423-56    | CAATTGTAGAGACTATCCACAAGGACAATATT<br>GTTAACATCTCTGATA GGTGTTCTGTTATAA                                                                                                                                                                                                                                                          | 79                   | 88                  |
| pTW423-58    | CAATTGTAGAGACTATCCACAAGGACAATATT<br>GTTAACATCTCTGATAGGTGTTCTGTTATAA                                                                                                                                                                                                                                                           | 84                   | 84                  |
| pTW423-510   | CAATTGTAGAGACTATCCACAAGGACAATATT<br>GTTAACATCTCTGATAGGTGTTCTGTTATAA                                                                                                                                                                                                                                                           | 79                   | 88                  |
| pTW423-513   | CAATTGTAGAGACTATCCACAAGGACAATATT<br>GTTAACATCTCTGATAGGTGTTCTGTTATAA                                                                                                                                                                                                                                                           | 63                   | 79                  |
| pTW423-513F  | $\begin{array}{c} \text{A}_G \text{A} \\ \text{CAATTGTAGAGACTATCCACAAGGACAATATT} \\ \text{GTTAACATCTCTGATA} \text{GGTGTGTTCTGTTATAA} \\ \text{G}_{\text{TG}} \\ \updownarrow \\ \text{A}_G \text{A} \\ \text{CAATTGTAGAGACTATCCACAAGGACAATATT} \\ \text{GTTAACATCTCTGATAGGTGTTCTGTTATAA} \\ \text{GG} \text{T}^G \end{array}$ | 99                   | 81                  |
| pTW423-517   | CAATTGTAGAGACTATCCACAAGGACAATATT<br>GTTAACATCTCTGATAGGTGTTCTGTTATAA                                                                                                                                                                                                                                                           | 66                   | 73                  |
| pTW423-522   | CAATTGTAGAGACTATCCACAAGGACAATATT<br>GTTAACATCTCTGATAGGTGTTCTGTTATAA                                                                                                                                                                                                                                                           | 61                   | 80                  |

**Supplemental Figure 1. Structure and ligation efficiency of oligonucleotide-modified plasmids.** Primer extension was used to measure the ligation efficiency of each oligonucleotide-modified plasmid.
